# Supplementary material
Source: PubMed Central journal article supplement (PMC4808435)
Supplement: NIHMS754307-supplement-5.pdf [file NIHMS754307-supplement-5.pdf]

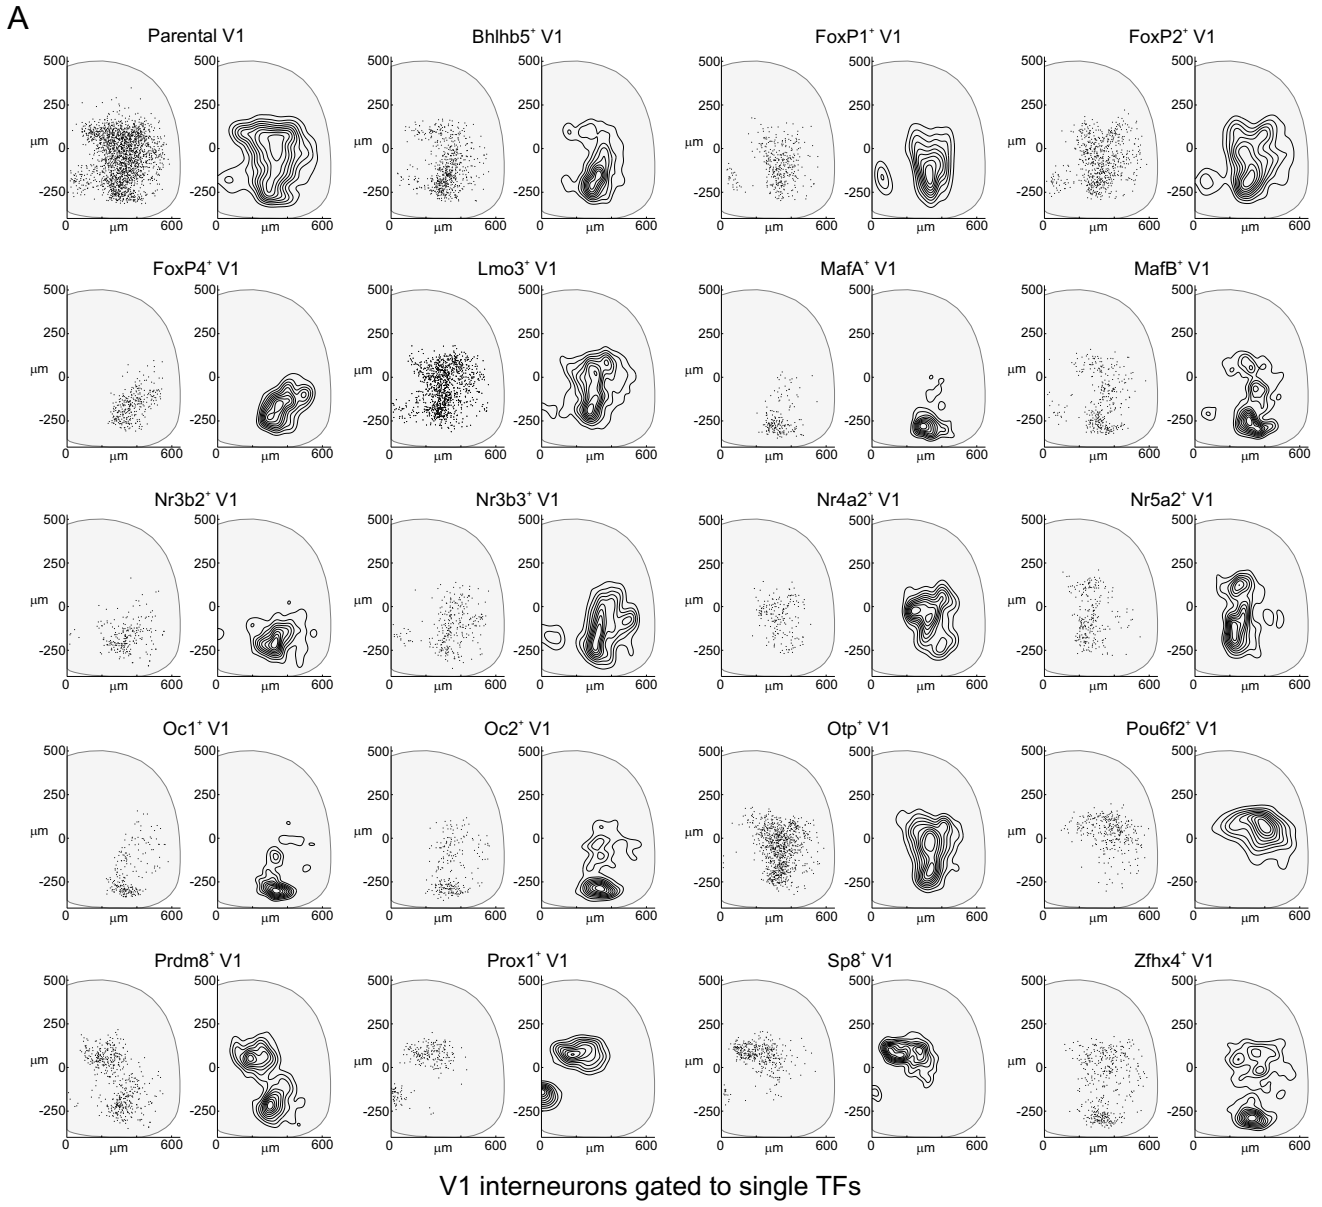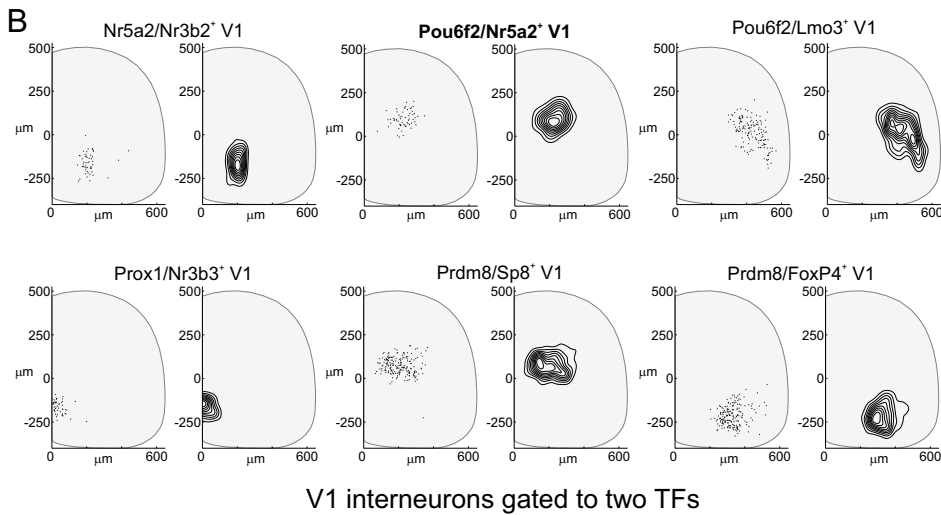

**C**

| TF     | # of inferred cell types |
|--------|--------------------------|
| Bhlhb5 | 23                       |
| FoxP1  | 16                       |
| FoxP2  | 19                       |
| FoxP4  | 15                       |
| Lmo3   | 35                       |
| MafA   | 4                        |
| MafB   | 18                       |
| Nr3b2  | 19                       |
| Nr3b3  | 17                       |
| Nr4a2  | 3                        |
| Nr5a2  | 6                        |
| Oc1    | 7                        |
| Oc2    | 10                       |
| Otp    | 15                       |
| Pou6f2 | 5                        |
| Prdm8  | 18                       |
| Prox1  | 8                        |
| Sp8    | 8                        |
| Zfhx4  | 13                       |

  

| V1                  | # of inferred cell types |
|---------------------|--------------------------|
| Nr5a2/Nr3b2         | 4                        |
| <b>Pou6f2/Nr5a2</b> | <b>1</b>                 |
| Pou6f2/Lmo3         | 4                        |
| Prox1/Nr3b3         | 3                        |
| Prdm8/Sp8           | 6                        |
| Prdm8/FoxP4         | 6                        |

Figure S3.
