# Supplementary material
Source: PubMed Central journal article supplement (PMC4808435)

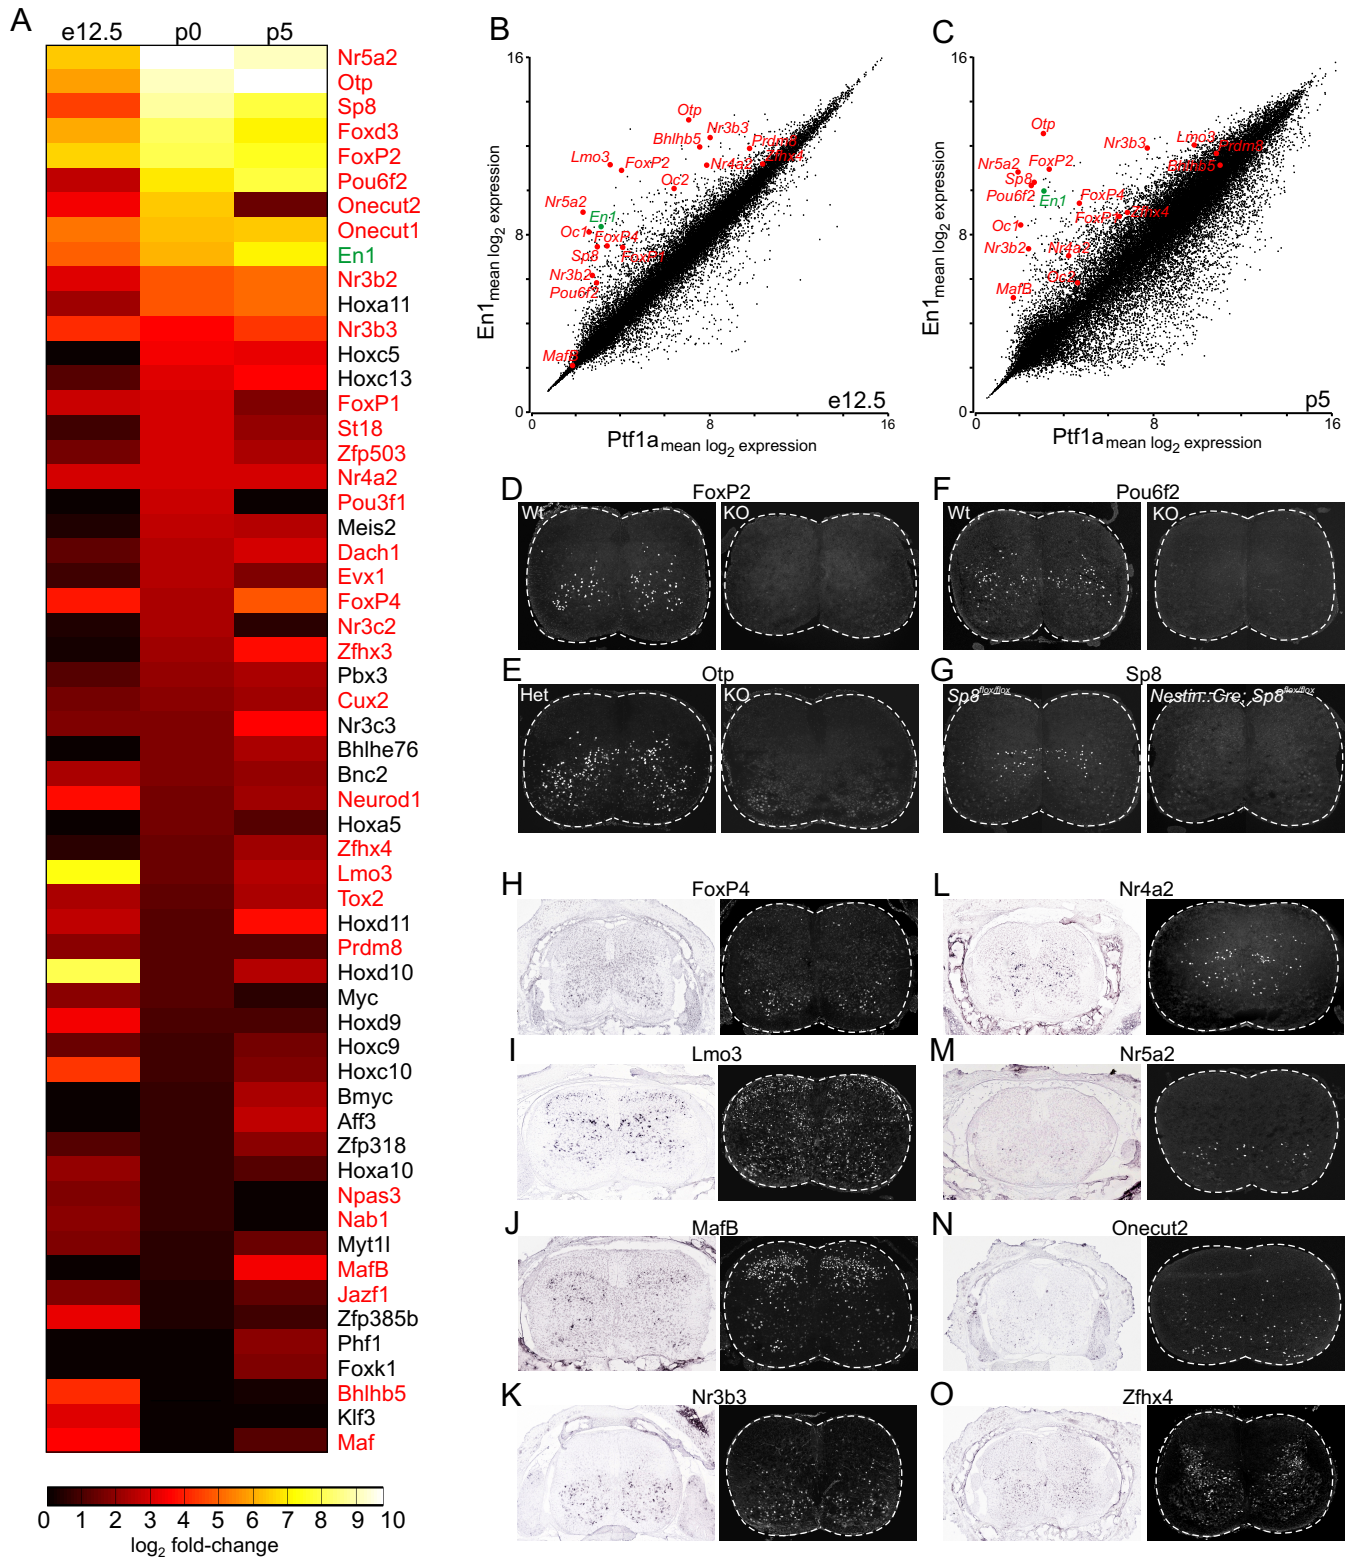

Figure S1.

Supplement: NIHMS754307-supplement-3.pdf [file NIHMS754307-supplement-3.pdf]

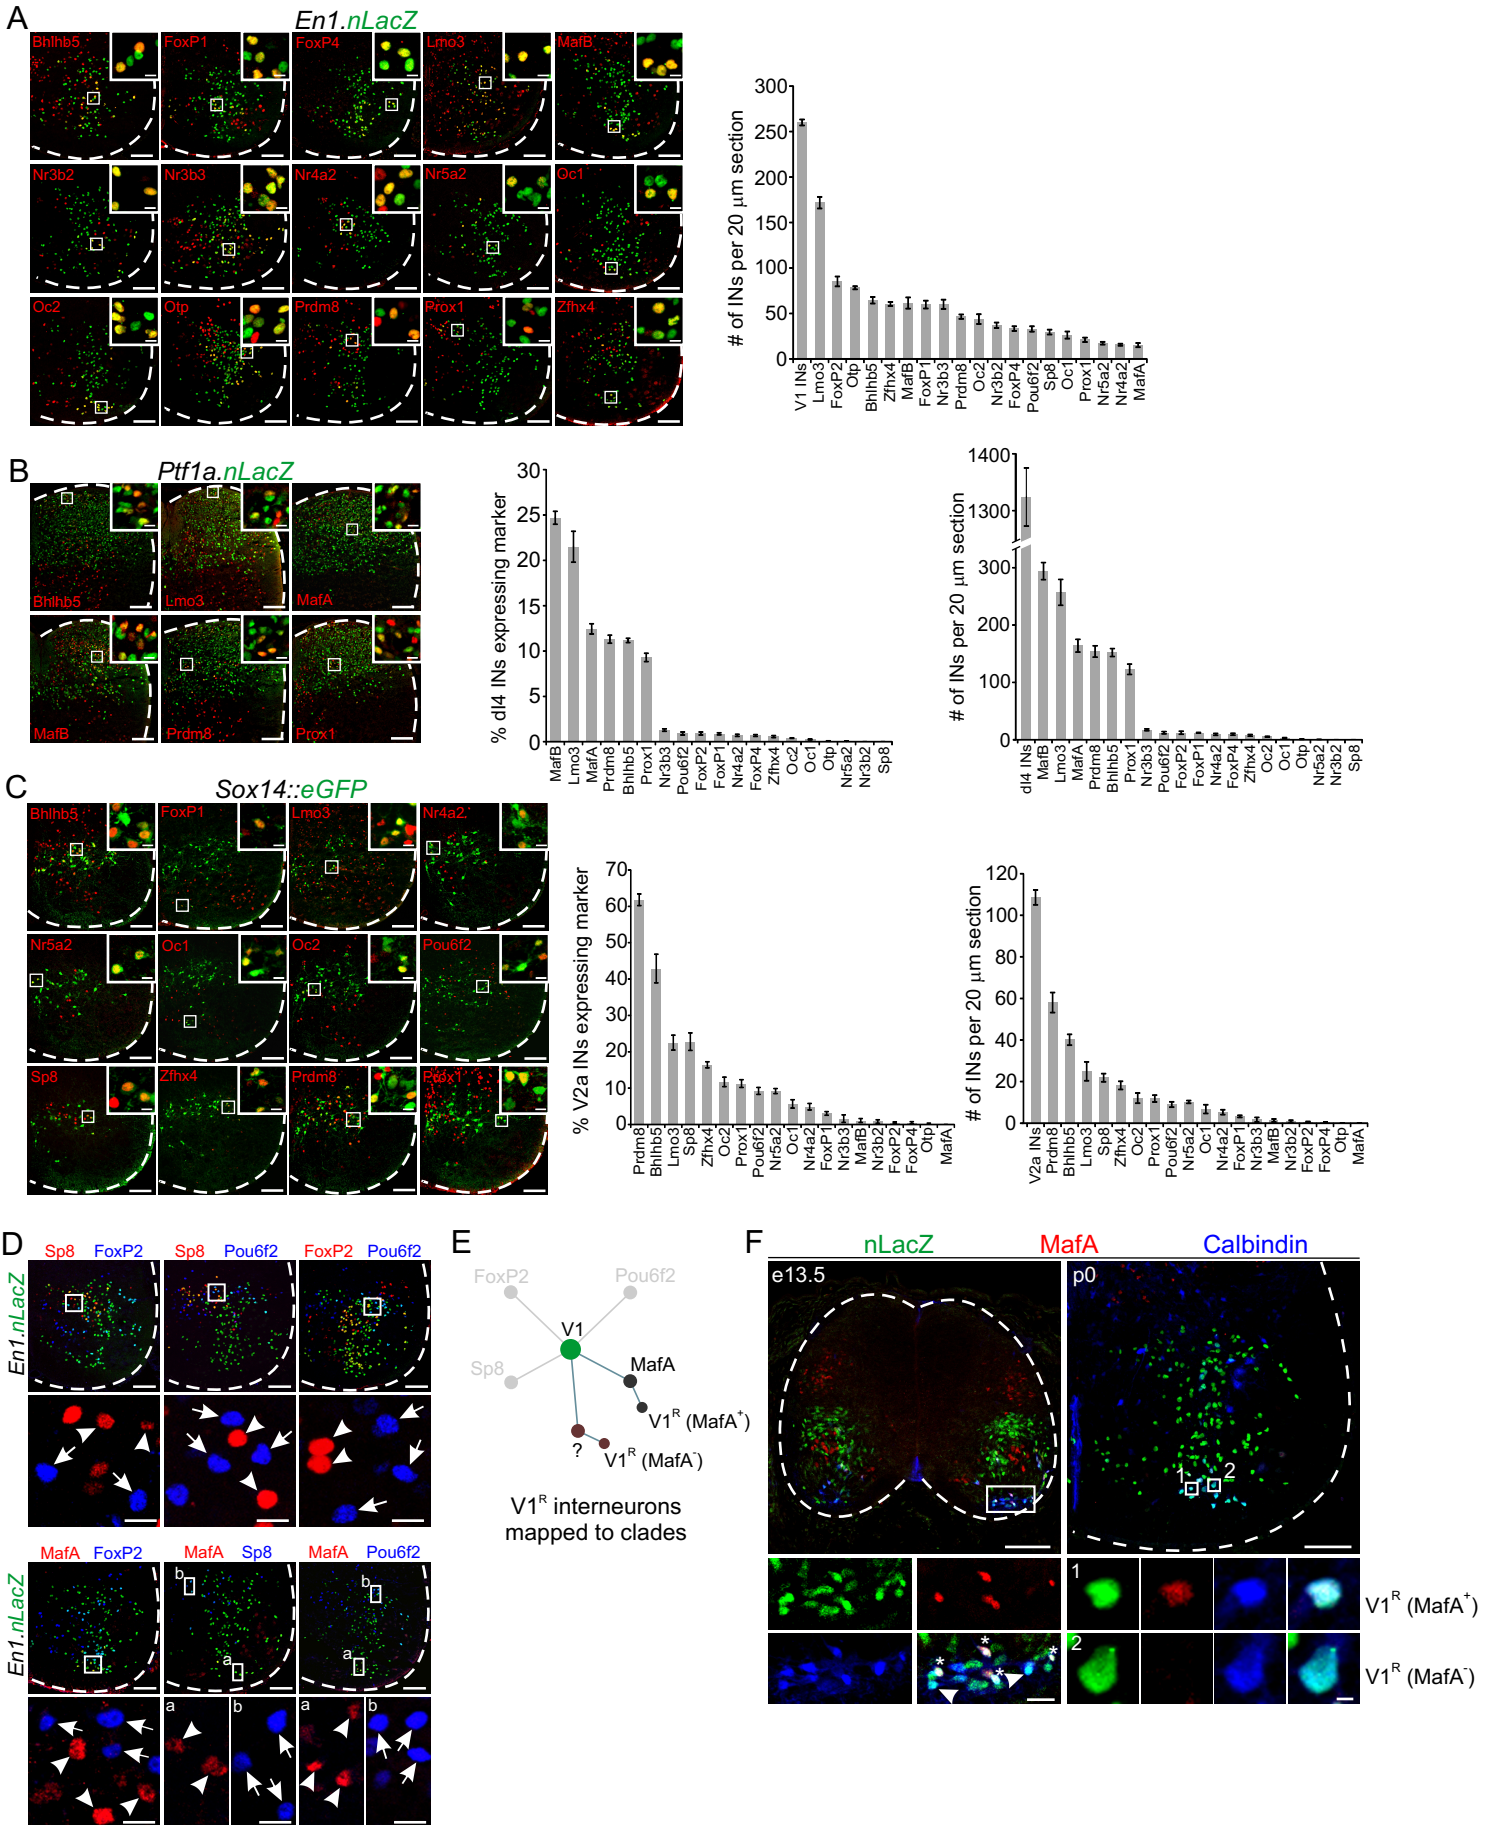

Figure S2.

Supplement: NIHMS754307-supplement-4.pdf [file NIHMS754307-supplement-4.pdf]

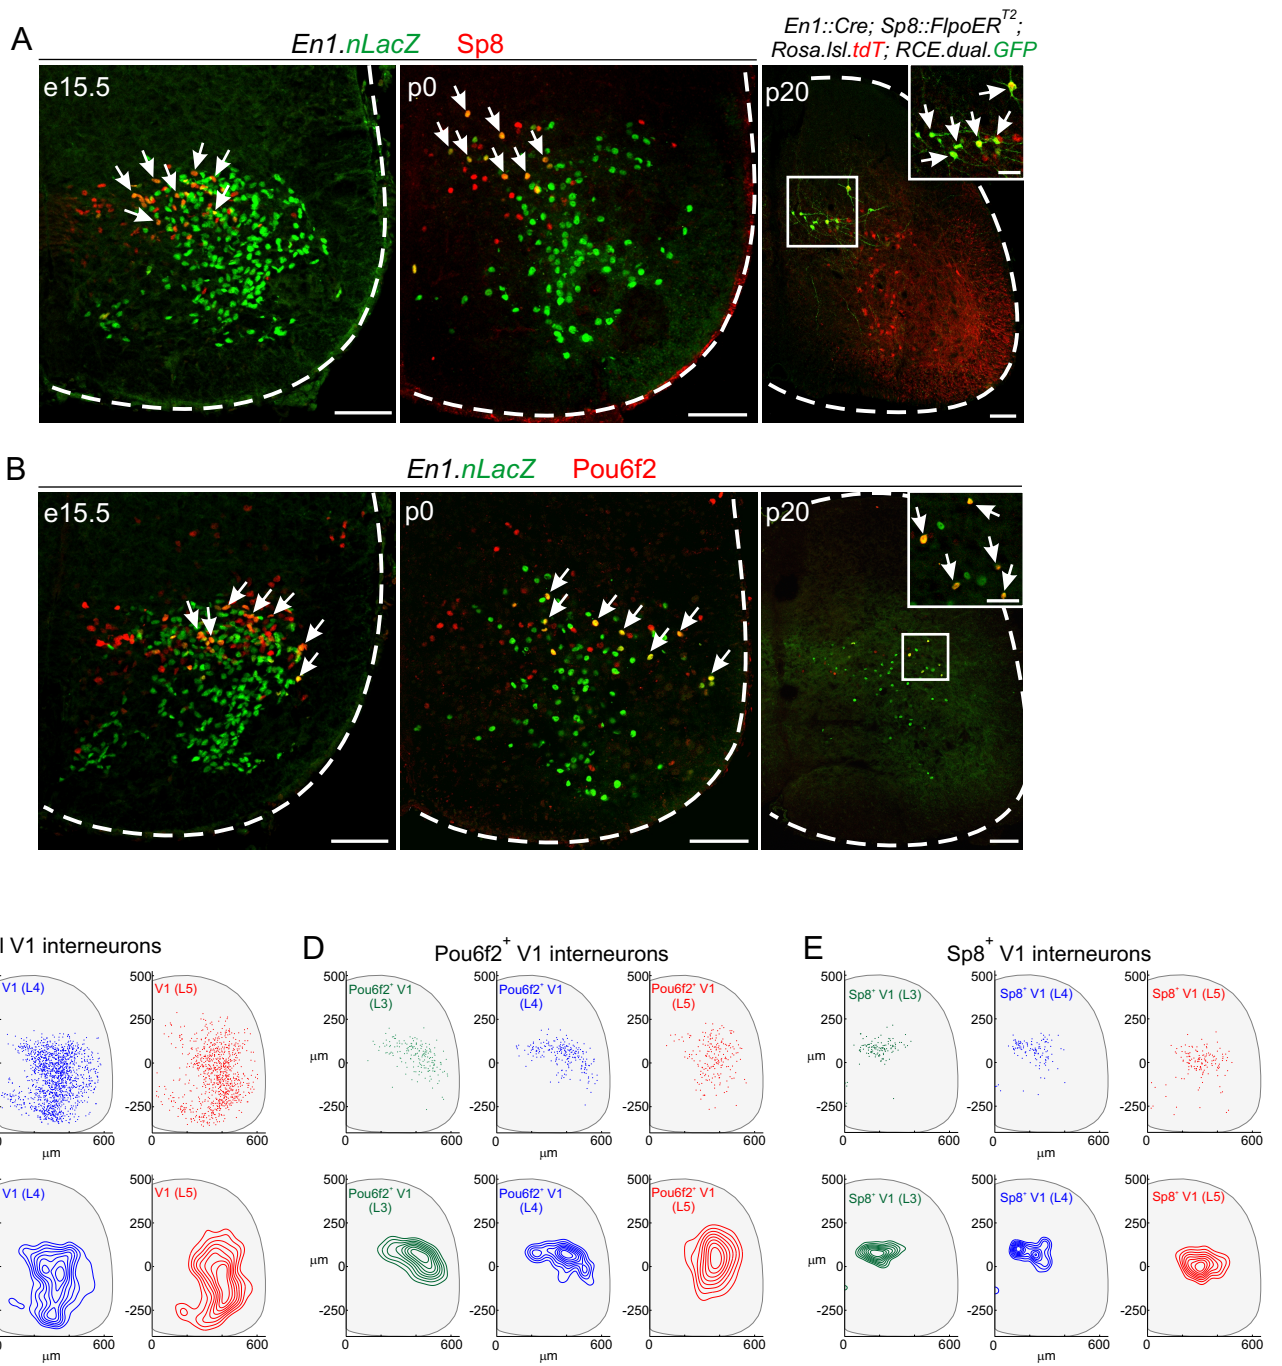

Figure S4.

Supplement: NIHMS754307-supplement-6.pdf [file NIHMS754307-supplement-6.pdf]

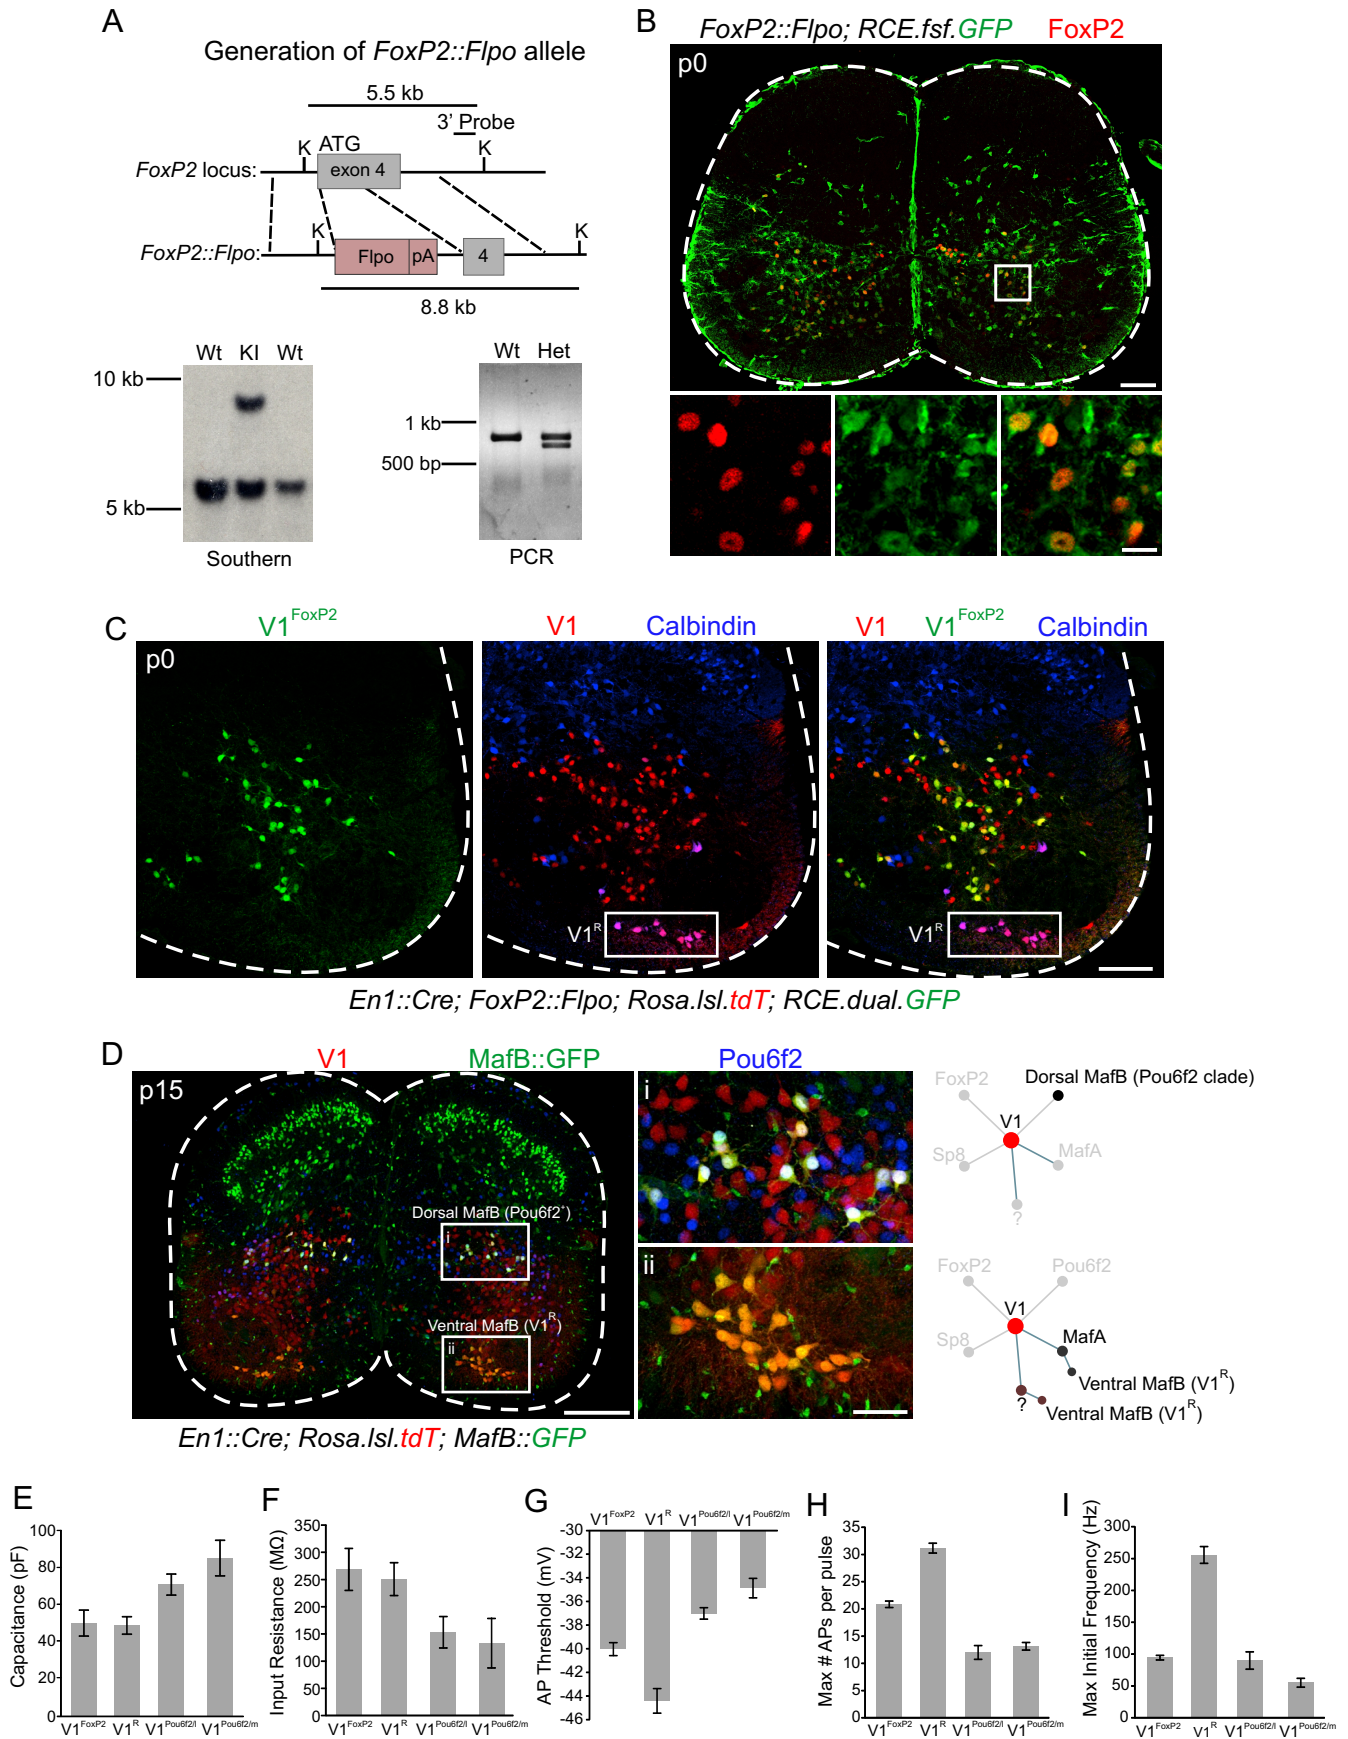

Figure S5.

Supplement: NIHMS754307-supplement-7.pdf [file NIHMS754307-supplement-7.pdf]

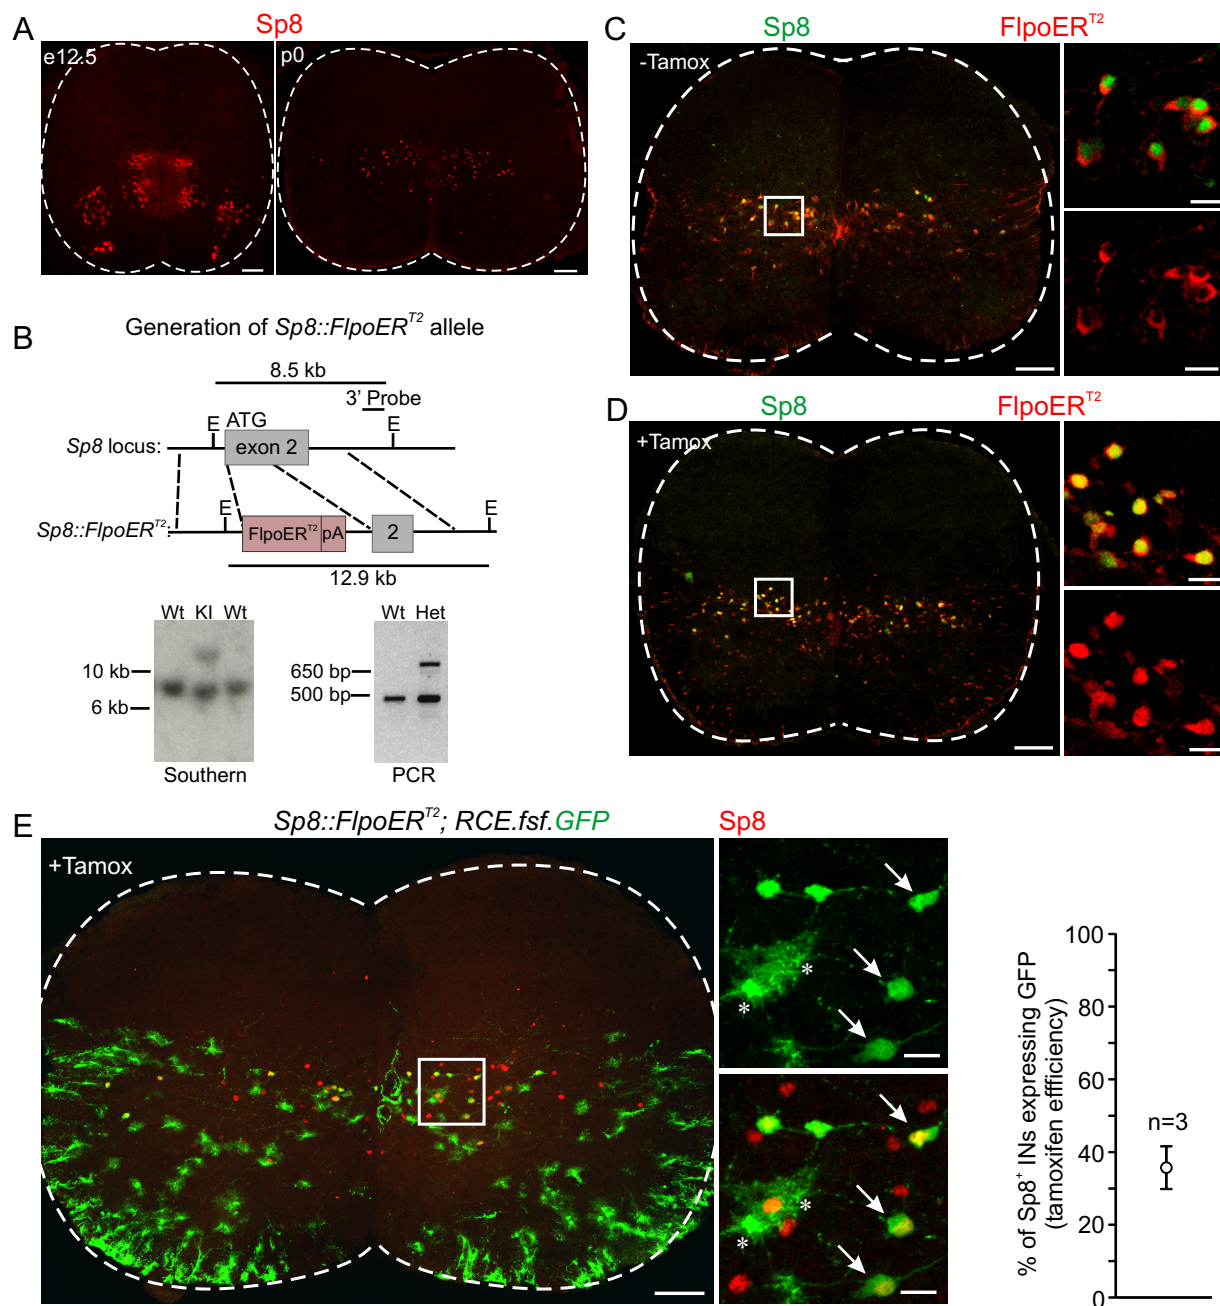

Figure S6.

Supplement: NIHMS754307-supplement-8.pdf [file NIHMS754307-supplement-8.pdf]

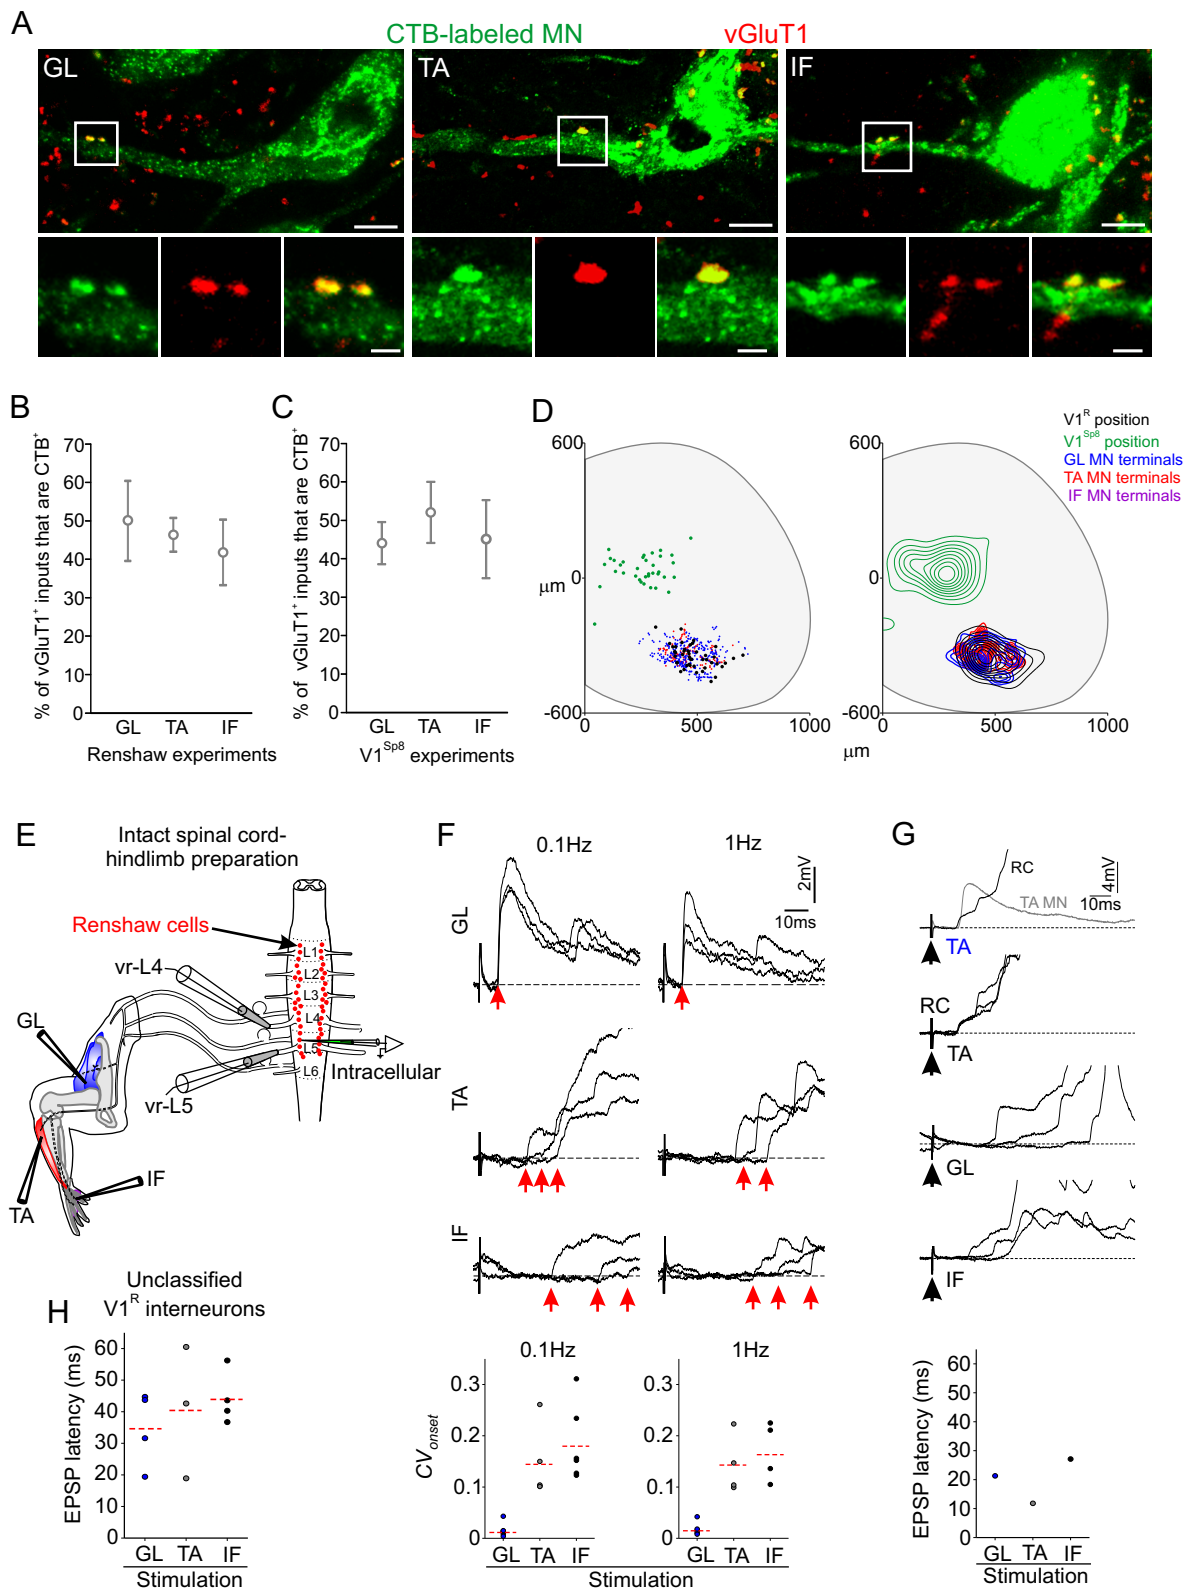

Figure S7.

Supplement: NIHMS754307-supplement-9.pdf [file NIHMS754307-supplement-9.pdf]
